# Supplementary material
Source: PubMed Central journal article supplement (PMC1065414)
Supplement: plntphys_pp.104.056028_3.pdf [file plntphys_pp.104.056028_3.pdf]

**Supplemental Table 5.** Quantification of CMV-Y and ORMV by quantitative real time PCR in mutant and wild type samples at 2 and 5 DAI.

| Virus | DAI | Genotype    | Relative Quantity ( $\pm$ SD) | p-value  |
|-------|-----|-------------|-------------------------------|----------|
| CMV   | 2   | Col-0       | 1.15 $\pm$ 0.91               | --       |
| CMV   | 2   | <i>ein2</i> | 6.94 $\pm$ 10.7               | 0.451562 |
| CMV   | 2   | <i>jar1</i> | 3.25 $\pm$ 0.77               | 0.151248 |
| CMV   | 2   | <i>eds5</i> | 4.07 $\pm$ 3.57               | 0.261370 |
| CMV   | 2   | <i>npr1</i> | 3.18 $\pm$ 3.83               | 0.468322 |
| CMV   | 2   | <i>pad4</i> | 1.32 $\pm$ 0.92               | 0.765739 |
| CMV   | 2   | <i>nahG</i> | 4.88 $\pm$ 7.02               | 0.459298 |
| CMV   | 5   | Col-0       | 3.98 $\pm$ 1.46               | --       |
| CMV   | 5   | <i>ein2</i> | 3.65 $\pm$ 2.68               | 0.660528 |
| CMV   | 5   | <i>jar1</i> | 6.59 $\pm$ 2.72               | 0.309733 |
| CMV   | 5   | <i>eds5</i> | 4.19 $\pm$ 1.56               | 0.579319 |
| CMV   | 5   | <i>npr1</i> | 7.78 $\pm$ 1.82               | 0.22226  |
| CMV   | 5   | <i>pad4</i> | 8.80 $\pm$ 3.18               | 0.188529 |
| CMV   | 5   | <i>nahG</i> | 5.56 $\pm$ 3.37               | 0.629422 |
| ORMV  | 2   | Col-0       | 18.5 $\pm$ 19.9               | --       |
| ORMV  | 2   | <i>ein2</i> | 8.32 $\pm$ 4.10               | 0.501529 |
| ORMV  | 2   | <i>jar1</i> | 37.2 $\pm$ 47.4               | 0.36380  |
| ORMV  | 2   | <i>eds5</i> | 30.2 $\pm$ 26.6               | 0.251883 |
| ORMV  | 2   | <i>npr1</i> | 10.6 $\pm$ 2.89               | 0.566522 |
| ORMV  | 2   | <i>pad4</i> | 8.99 $\pm$ 8.44               | 0.288945 |
| ORMV  | 2   | <i>nahG</i> | 7.79 $\pm$ 5.31               | 0.439162 |
| ORMV  | 5   | Col-0       | 12.7 $\pm$ 1.70               | --       |
| ORMV  | 5   | <i>ein2</i> | 9.53 $\pm$ 5.93               | 0.376879 |
| ORMV  | 5   | <i>jar1</i> | 46.5 $\pm$ 25.4               | 0.163299 |
| ORMV  | 5   | <i>eds5</i> | 19.0 $\pm$ 20.5               | 0.664083 |
| ORMV  | 5   | <i>npr1</i> | 58.7 $\pm$ 45.1               | 0.382716 |
| ORMV  | 5   | <i>pad4</i> | 47.9 $\pm$ 36.5               | 0.251725 |
| ORMV  | 5   | <i>nahG</i> | 15.1 $\pm$ 9.36               | 0.730155 |
